# Supplementary material for: Group 2 innate lymphoid cells contribute to IL-33-mediated alleviation of cardiac fibrosis
Source: PubMed Central journal article supplement (PMC7806479; doi:10.7150/thno.51648), 2021-01-01
Supplement: thnov11p2594s1.pdf [file thnov11p2594s1.pdf]

## Supplementary information

**Table S1. Antibodies used for flow cytometry and tissue/cell staining**

| <b>Antibody/reagent</b>                   | <b>Clone</b> | <b>Concentration (µg/ml)</b> | <b>Supplier (Cat#)</b>      |
|-------------------------------------------|--------------|------------------------------|-----------------------------|
| <b>Biotin anti-F4/80</b>                  | REA126       | FC (3.75)                    | Mitenyi Biotec 130-116-514  |
| <b>PerCP/Cy5.5 anti-CD45</b>              | 30-F11       | FC (1)                       | Biologend 103132            |
| <b>FITC anti-CD3ε</b>                     | 145-2C11     | FC (2.5)                     | Biologend 100306            |
| <b>FITC anti-CD11b</b>                    | M1/70        | FC (2.5)                     | Biologend 101206            |
| <b>FITC anti-CD11c</b>                    | N418         | FC (2.5)                     | Biologend 117306            |
| <b>FITC anti-CD19</b>                     | 6D5          | FC (2.5)                     | Biologend 115506            |
| <b>FITC anti-CD49b</b>                    | DX5          | FC (2.5)                     | Biologend 108906            |
| <b>FITC anti-F4/80</b>                    | BM8          | FC (2.5)                     | Biologend 123108            |
| <b>FITC anti-FcεRI</b>                    | MAR-1        | FC (2.5)                     | Biologend 134306            |
| <b>eFlour 450 anti-Thy1.2</b>             | 53-2.1       | FC (4)                       | Thermo Fisher 48-0902-82    |
| <b>PE anti-ST2</b>                        | U29-93       | FC (5)                       | BD 566311                   |
| <b>PE anti-RELMα</b>                      | DS8RELM      | FC (1)                       | Thermo Fisher 12-5441-80    |
| <b>PE/Cy7 anti-CD8a</b>                   | 53-6.7       | FC (1)                       | Biologend 100722            |
| <b>PE/Cy7 Streptavidin</b>                | N/A          | FC (2)                       | Thermo Fisher 25-4317-82    |
| <b>APC anti-KLRG1</b>                     | 2F1          | FC (2)                       | Biologend 138411            |
| <b>APC anti-SiglecF</b>                   | S17007L      | FC (2)                       | Biologend 155507            |
| <b>APC anti-CD11c</b>                     | N418         | FC (1)                       | Biologend 117310            |
| <b>APC anti-NKp46</b>                     | 29A1.4       | FC (1)                       | Biologend 137607            |
| <b>Alexa Fluor 647 anti-GATA3</b>         | L50-823      | FC (1:5)                     | BD 560068                   |
| <b>APC/Cy7 anti-CD4</b>                   | GK1.5        | FC (1)                       | Biologend 100413            |
| <b>APC/Cy7 anti-CD19</b>                  | 6D5          | FC (1)                       | Biologend 115529            |
| <b>APC/Cy7 anti-CD45</b>                  | 30-F11       | FC (1)                       | BD 557659                   |
| <b>BV421 anti-CD86</b>                    | GL-1         | FC (2)                       | Biologend 105032            |
| <b>BV421 anti-GATA3</b>                   | 16E10A23     | FC (1:20)                    | Biologend 653814            |
| <b>BV421 anti-SiglecF</b>                 | S17007L      | FC (2)                       | Biologend 155509            |
| <b>Fixable Viability Dye eFluor 506</b>   | N/A          | FC (1:250)                   | Thermo Fisher 65-0866-14    |
| <b>Fixable Viability Dye eFluor 780</b>   | N/A          | FC (1:250)                   | Thermo Fisher 65-0865-14    |
| <b>Anti-Cardiac Troponin I</b>            | 4C2          | IF (1:200)                   | Abcam, ab10231              |
| <b>Alexa Fluor 647 WGA</b>                | N/A          | IF (1:200)                   | W32466,                     |
| <b>Biotin-Isolectin B4</b>                | N/A          | IF (1:100)                   | Invitrogen, I21414          |
| <b>Anti-IL-33</b>                         | N/A          | IF (1:200)                   | R&D Systems, AF3626         |
| <b>Anti-Phospho-Histone H2AX (Ser139)</b> | 20E3         | IF (1:200)                   | Cell Signaling, 9718        |
| <b>Anti-Vimentin</b>                      | EPR3776      | IF (1:200)                   | Abcam, ab92547              |
| <b>Anti-Periostin</b>                     | N/A          | IHC (1:200)                  | Sino Biological, 50450-RP02 |
| <b>Anti-BMP7</b>                          | 4E7          | Neu (1.0)                    | Arigo, ARG56924             |

**Table S2. Primers used for qRT-PCR.**

| <b>Gene</b>   | <b>Species</b> | <b>Sequence (5'-3')</b>                                               |
|---------------|----------------|-----------------------------------------------------------------------|
| <i>IL5</i>    | Mouse          | Forward: TCAGGGGCTAGACATACTGAAG<br>Reverse: CCAAGGAACTCTTGCAGGTAAT    |
| <i>IL13</i>   | Mouse          | Forward: CCTGGCTCTTGCTTGCCTT<br>Reverse: GGTCTTGTGTGATGTTGCTCA        |
| <i>Areg</i>   | Mouse          | Forward: GCAGATACATCGAGAACCTGG<br>Reverse: CTGCAATCTTGGATAGGTCCTTG    |
| <i>Hbegf</i>  | Mouse          | Forward: TTTGGAGAGTCCTTTGCAGA<br>Reverse: TGTGACAATGAGATTCCTTGTG      |
| <i>Bmp7</i>   | Mouse          | Forward: GATTTTCAGCCTGGACAACGAG<br>Reverse: GGGCAACCCTAAGATGGACAG     |
| <i>IL10</i>   | Mouse          | Forward: GCTCTTACTGACTGGCATGAG<br>Reverse: CGCAGCTCTAGGAGCATGTG       |
| <i>Csf3</i>   | Mouse          | Forward: CCTGGAGCAAGTGAGGAAGA<br>Reverse: CAGCTTGTAGGTGGCACACA        |
| <i>Bcl2</i>   | Mouse          | Forward: CCTGTGGATGACTGAGTACC<br>Reverse: GAGACAGCCAGGAGAAATCA        |
| <i>Bax</i>    | Mouse          | Forward: GTTTCATCCAGGATCGAGCAG<br>Reverse: CATCTTCTTCCAGATGGTGA       |
| <i>Arg1</i>   | Mouse          | Forward: CCAGAAGAATGGAAGAGTCAGTGT<br>Reverse: GCAGATATGCAGGGAGTCACC   |
| <i>Ym1</i>    | Mouse          | Forward: CAAGTTGAAGGCTCAGTGGCTC<br>Reverse: CAAATCATTGTGTAAAGCTCCTCTC |
| <i>Postn</i>  | Mouse          | Forward: GAACGAATCATTACAGGTCC<br>Reverse: GGAGACCTCTTTTTGCAAGA        |
| <i>Tnc</i>    | Mouse          | Forward: GCTACTGCCAGGCATCTTTC<br>Reverse: GAAGCTCCCCTGGACTCTG         |
| <i>Timp1</i>  | Mouse          | Forward: GAGAAACCAGCTTGGAACCAG<br>Reverse: GGGGCCATCATGGTATCTGC       |
| <i>Colla2</i> | Mouse          | Forward: ACTCAGCCACCCAGAGTGGAA<br>Reverse: TTGACAGGTTGGGCTGGA         |
| <i>Col3a1</i> | Mouse          | Forward: GCACAGCAGTCCAACGTAGA<br>Reverse: GCACAGCAGTCCAACGTAGA        |
| <i>Lox</i>    | Mouse          | Forward: TCTTCTGCTGCGTGACAACC<br>Reverse: GAGAAACCAGCTTGGAACCAG       |

**Table S3. Reagents used in this study**

| <b>Reagent</b>                                                                          | <b>Supplier (Cat#)</b>              |
|-----------------------------------------------------------------------------------------|-------------------------------------|
| FBS                                                                                     | Gibco (10437-028)                   |
| DMEM/F12                                                                                | Gibco (11330-032)                   |
| 10X Trypsin-EDTA (0.5%)                                                                 | Gibco (15400-054)                   |
| Collagenase Type II                                                                     | Worthington (LS004177)              |
| Penicillin/Streptomycin                                                                 | Gibco (15140122)                    |
| L-Ascorbic acid                                                                         | Sigma (A4544)                       |
| Mouse recombinant IL-33                                                                 | BioLegend (580502)                  |
| Human recombinant TGF- $\beta$                                                          | PeproTech (100-21C)                 |
| High-Capacity RNA-to-cDNA <sup>TM</sup> Kit                                             | Applied Biosystems (4387406)        |
| TRIzol <sup>TM</sup> Reagent                                                            | Invitrogen <sup>TM</sup> (15596026) |
| Quick-RNA 96 Kit                                                                        | ZYMO (R1052)                        |
| Quantinova SYBR Green PCR Kit                                                           | Qiagen (208054)                     |
| Galetin                                                                                 | Sigma (G9136)                       |
| TUNEL (In Situ Cell Death Detection Kit, Fluorescein)                                   | Roche (11684795910)                 |
| Picro Sirius Red Stain Kit                                                              | Abcam (ab150681)                    |
| DL-Isoproterenol Hemisulfate                                                            | Santa Cruz (sc-294398)              |
| Mouse IL-5 ELSIA                                                                        | R&D Systems (DY405-05)              |
| Mouse IL-13 ELISA                                                                       | R&D Systems (DY413-05)              |
| Mouse IL-10 ELISA                                                                       | R&D Systems (DY417-05)              |
| Mouse HB-EGF ELISA                                                                      | R&D Systems (DY8239-05)             |
| Mouse Amphiregulin ELISA                                                                | R&D Systems (DY-989)                |
| Mouse G-CSF ELISA                                                                       | R&D Systems (DY414-05)              |
| Mouse BMP-7 ELISA                                                                       | Invitrogen (# EMBMP7)               |
| MILLIPLEX MAP Mouse Cytokine/Chemokine Magnetic Bead Panel - Immunology Multiplex Assay | Merck (MCYTOMAG-70K)                |

**A**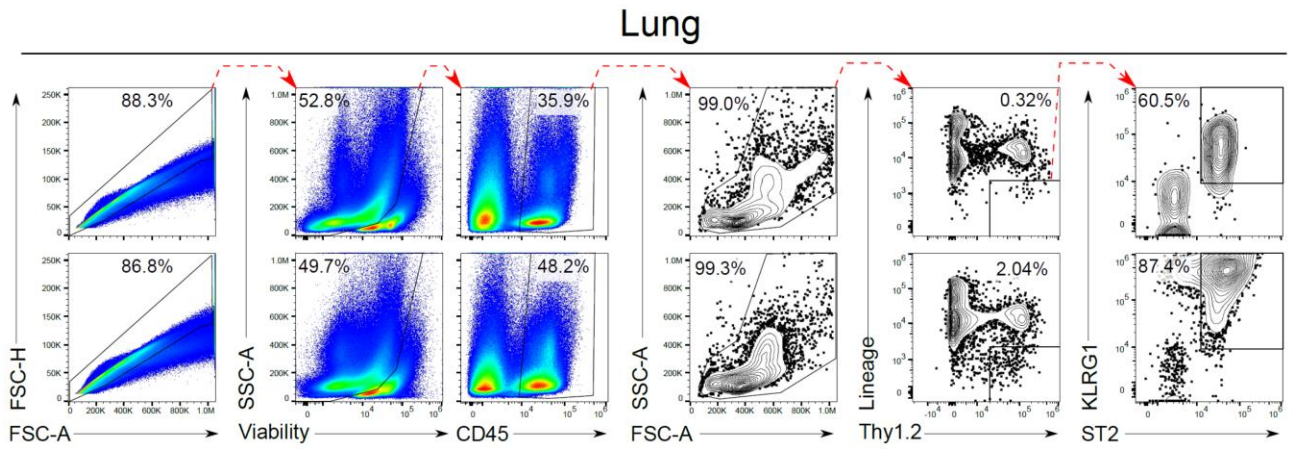**B**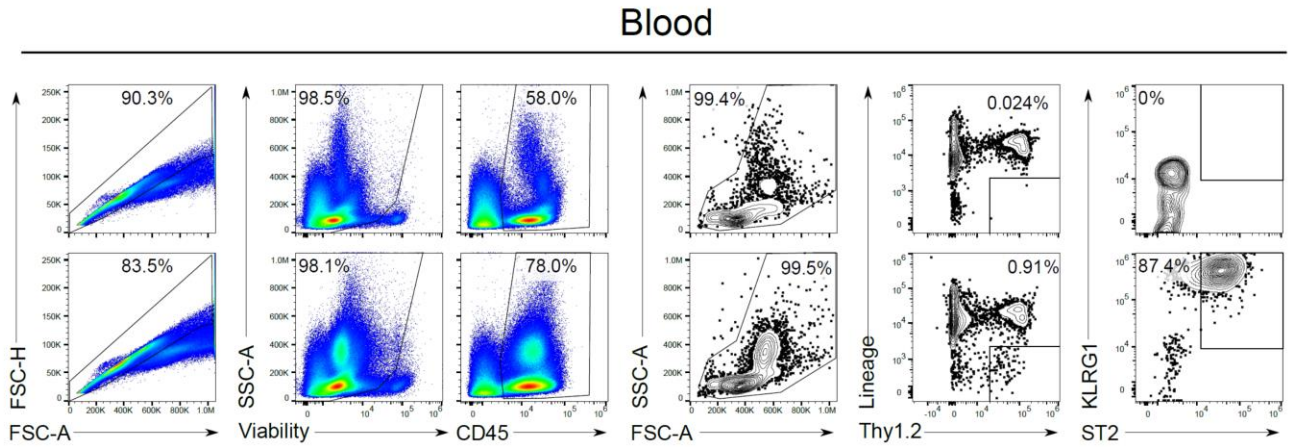

**Figure S1. IL-33 increases the cardiac ILC2 population via ST2.** Wild-type C57BL/6 mice were treated with saline or IL-33 ( $2 \mu\text{g mouse}^{-1}\text{day}^{-1}$  for 5 days). (A-B) The lung tissues and peripheral blood from the mice were harvested for flow cytometry analysis of the cell surface markers.

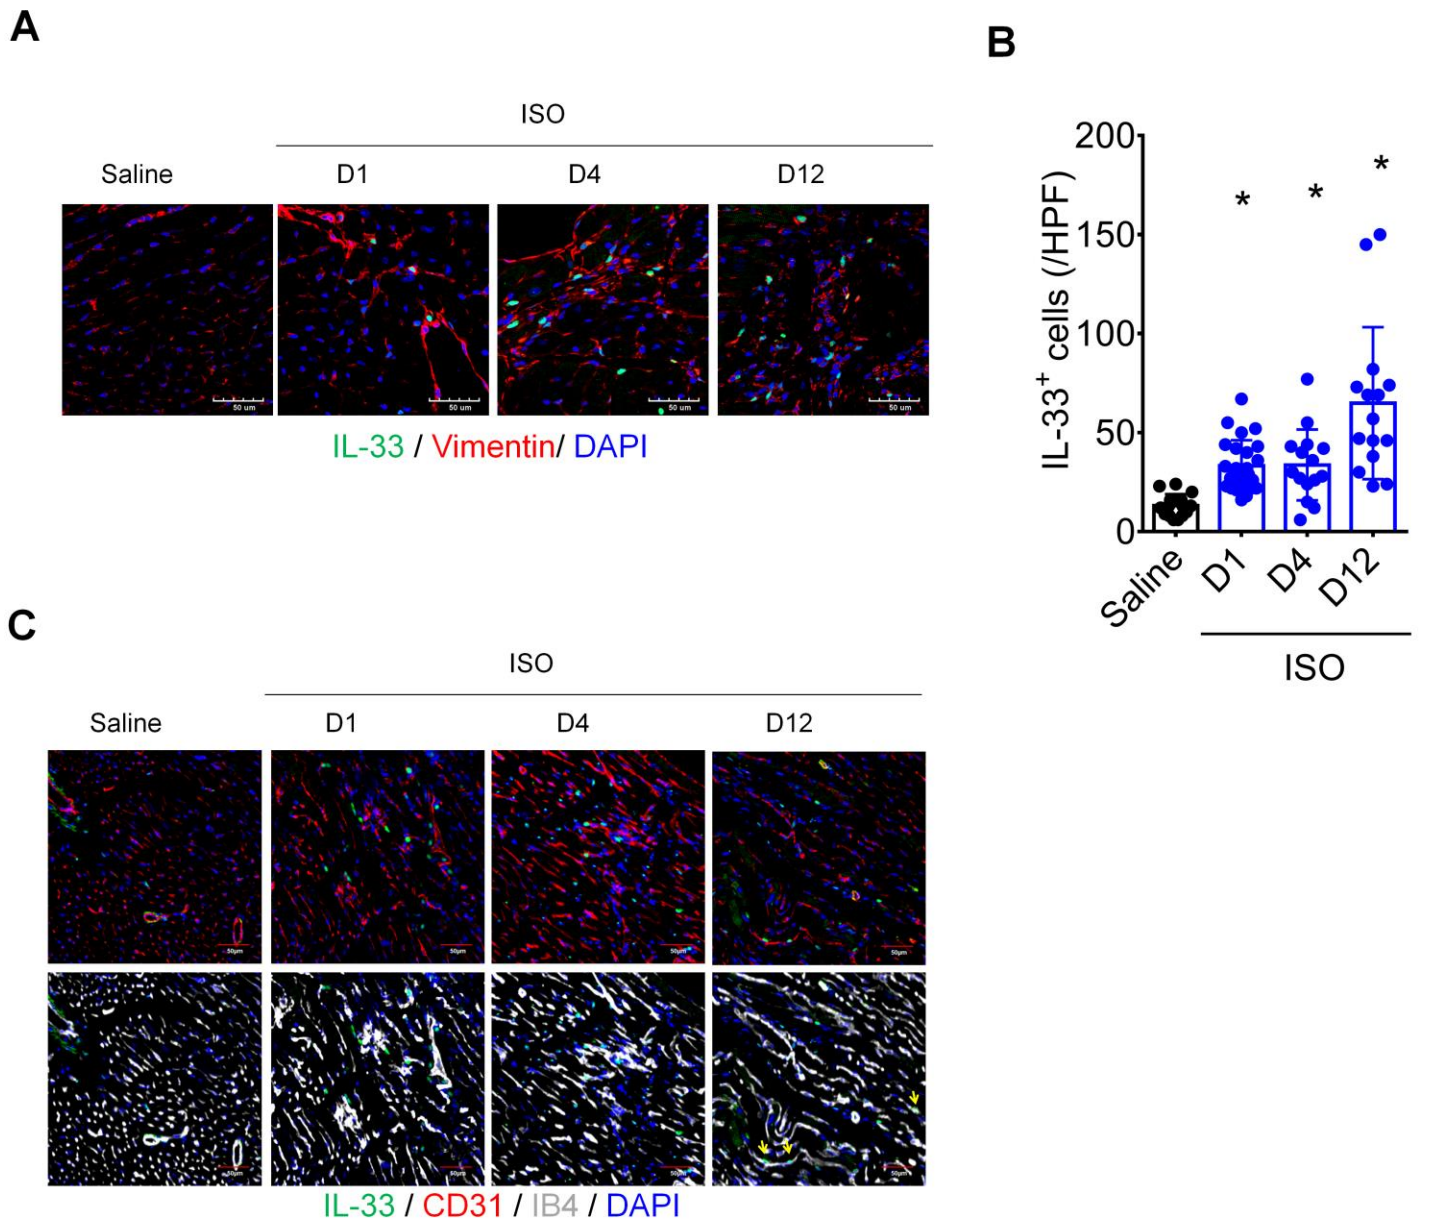

**Figure S2. IL-33 expression is upregulated following isoproterenol (ISO)-induced cardiac injury.**

BALB/cByJ mice (n=3 in each group) were subcutaneously administered with ISO (60 mg/kg) for 3 days. The heart tissues were collected on day 1, 4, and 12 after the last ISO treatment. **(A)** Representative images of immunofluorescence staining for IL-33 (green), Vimentin (red), and nuclei (blue). **(B)** Quantification of IL-33<sup>+</sup> cells per high-power field (200X magnification). **(C)** Representative images of immunofluorescence staining for IL-33 (green), CD31 (red), isolectin IB4 (IB4) (gray), and nuclei (blue).

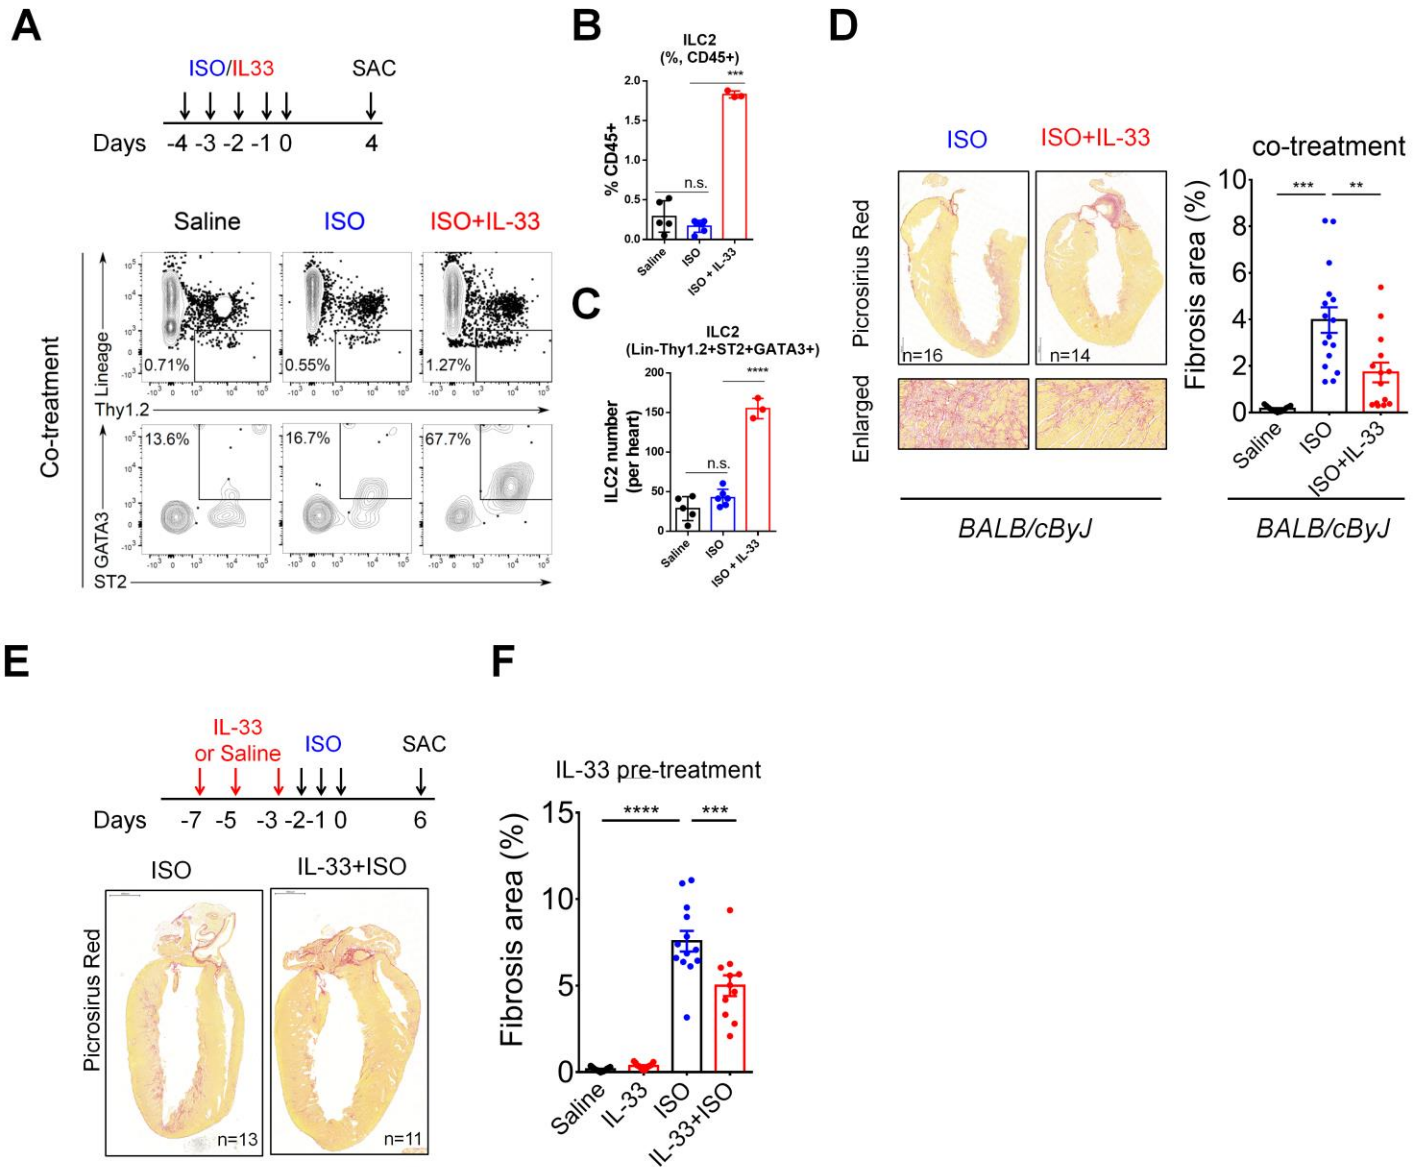

**Figure S3. Co-treatment or pre-treatment of IL-33 reduces ISO-induced cardiac fibrosis.** (A) BALB/cByJ mice were subcutaneously administered with saline, isoproterenol (ISO), or ISO+ IL-33 for 5 days. On day 4 after the last ISO injection, mice were euthanized (SAC), and cardiac tissues were collected for histological analysis. Flow cytometry analysis of the CD45<sup>+</sup>Lin<sup>-</sup>Thy1.2<sup>+</sup>GATA3<sup>+</sup> ILC2 population in the hearts. (B) Frequency of ILC2 among CD45<sup>+</sup> cells. (C) Cell number of ILC2s per heart. (D) Picrosirius red staining. Quantification of the cardiac fibrosis area. Scale bar = 100  $\mu$ m. (E-F) BALB/cByJ mice were pre-treated with intraperitoneally administered saline or IL-33 (0.5  $\mu$ g/mouse) for a total of 3 doses. Then the mice were subcutaneously administered saline or ISO (60 mg kg<sup>-1</sup> day<sup>-1</sup>) for 3 days. The cardiac tissues were collected for histological analysis on day 6 after the last ISO injection (SAC). (E) Picrosirius red staining for fibrosis area. (F) Quantification of cardiac fibrosis area. \*\*\* $P < 0.001$ , \*\*\*\* $P < 0.0001$  by one-way ANOVA followed by the Bonferroni multiple comparison post-hoc test. All values are means  $\pm$  SD. Each dot indicates a biological replicate.

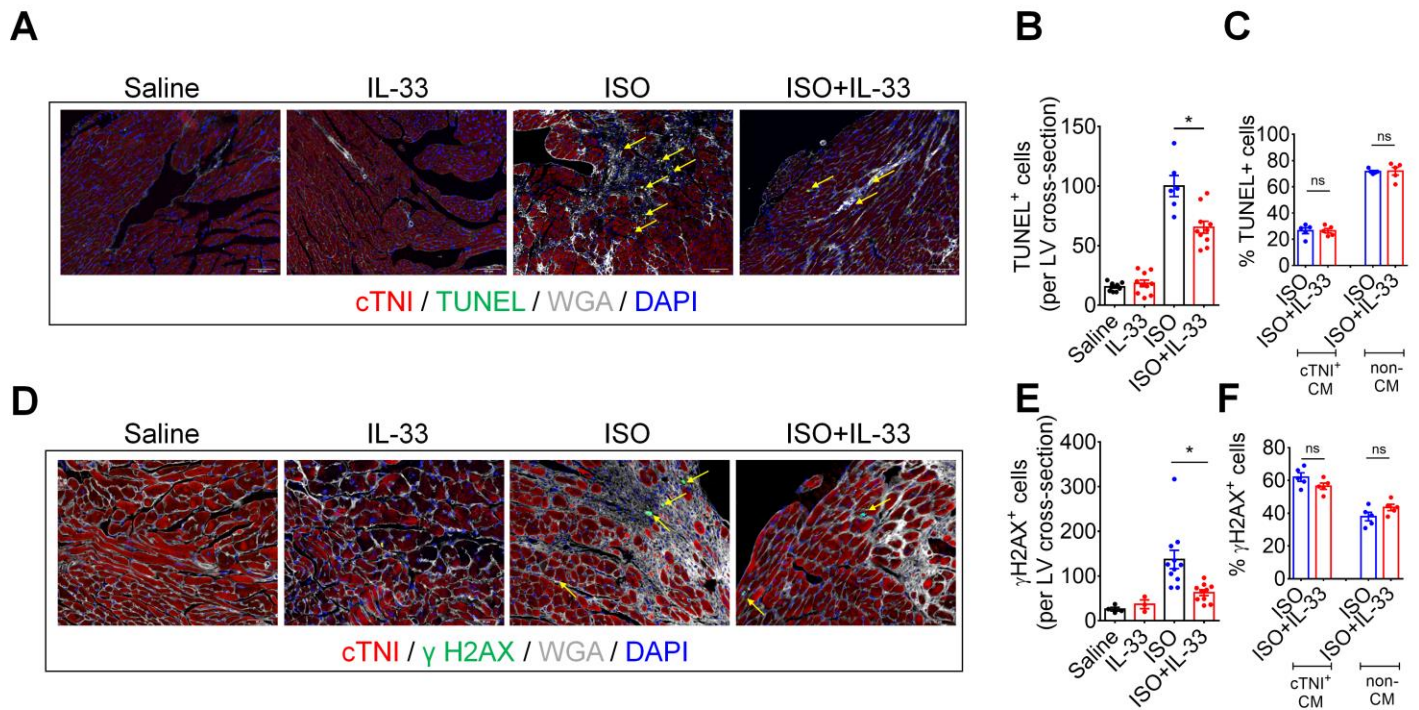

**Figure S4. IL-33 treatment ameliorates ISO-induced cell death.** (A) Representative images of immunofluorescent staining and (B) quantification of TUNEL<sup>+</sup> cells in the left ventricle region. Yellow arrowheads indicate respectively labeled cells. Number of positive stained cells in the left ventricle region was quantified in each heart cross-section (8–10 immunofluorescent images at 200X magnification). (C) Percentages of cTNI<sup>+</sup>TUNEL<sup>+</sup> CMs and cTNI<sup>-</sup>TUNEL<sup>+</sup> non-CMs among the total TUNEL<sup>+</sup> cells. (D) Representative images of immunofluorescent staining and (E) quantification of γH2AX<sup>+</sup> cells in the left ventricle region. Yellow arrowheads indicate respectively labeled cells. Number of positive stained cells in the left ventricle region was quantified in each heart cross-section (8–10 immunofluorescent images at 200X magnification). (F) Percentages of cTNI<sup>+</sup>γH2AX<sup>+</sup> CMs and cTNI<sup>-</sup>γH2AX<sup>+</sup> non-CMs among the total γH2AX<sup>+</sup> cells. ns, no significance; \* $P < 0.05$  by one-way ANOVA followed by the Bonferroni multiple comparison post-hoc test. All values are means  $\pm$  SD. Each dot indicates a biological replicate.

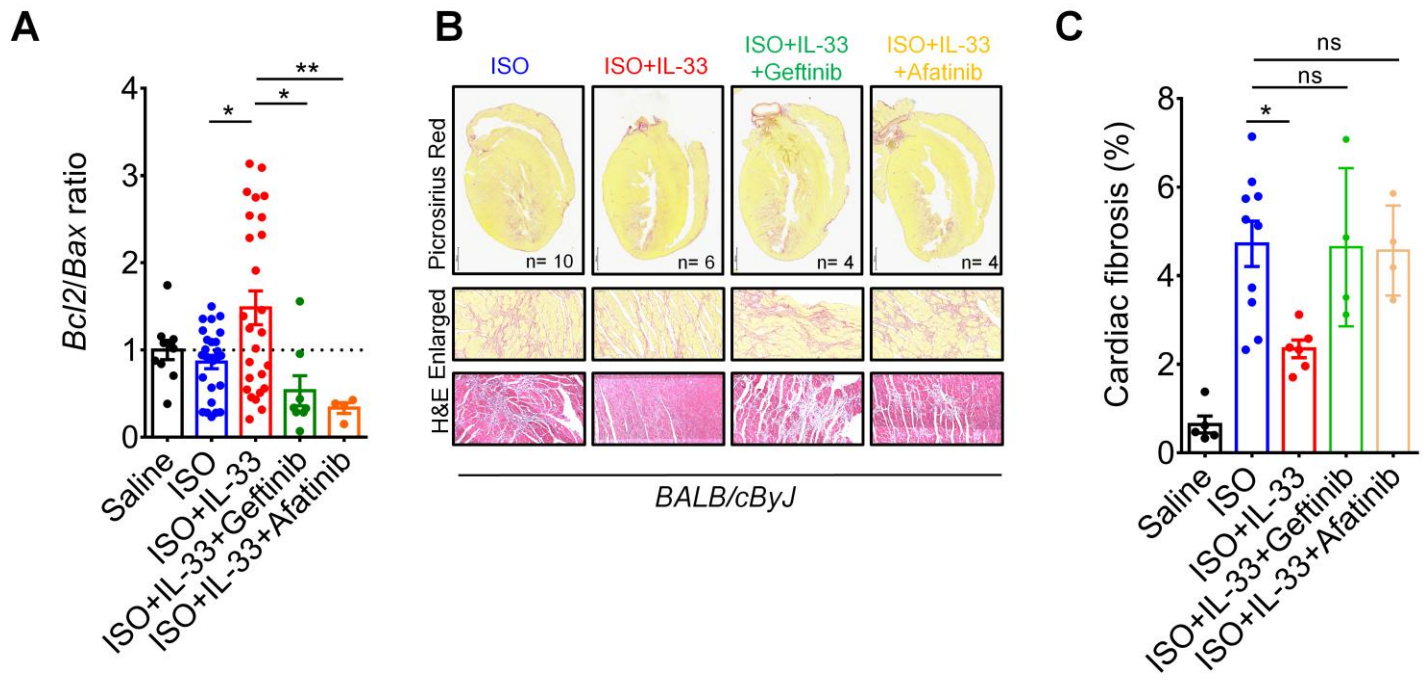

**Figure S5. EGFR Signaling is required for optimal function of IL-33 to mitigate cardiac fibrosis.** The mice were intraperitoneally administered with Saline, IL-33 (0.5  $\mu$ g/mouse), IL-33 (0.5  $\mu$ g) + Gefitinib (10 mg/kg), or IL-33 (0.5  $\mu$ g) + Afatinib (10 mg/kg) on day 3, 5, and 7. **(A)** Ratio of *Bcl2* versus *Bax* gene expression levels in the cardiac tissues. \* $P$  < 0.05, \*\* $P$  < 0.01 by one-way ANOVA followed by the Bonferroni multiple comparison post-hoc test. The fold increase represents relative gene expression compared with saline-treated controls. **(B)** The cardiac tissues were collected for Picosirius red staining of the fibrotic area. **(C)** Quantification of the fibrosis area in the heart sections. \* $P$  < 0.05. ns, not significant by one-way ANOVA followed by the Bonferroni multiple comparison post-hoc test. All values are means  $\pm$  SD. Each dot indicates a biological replicate.



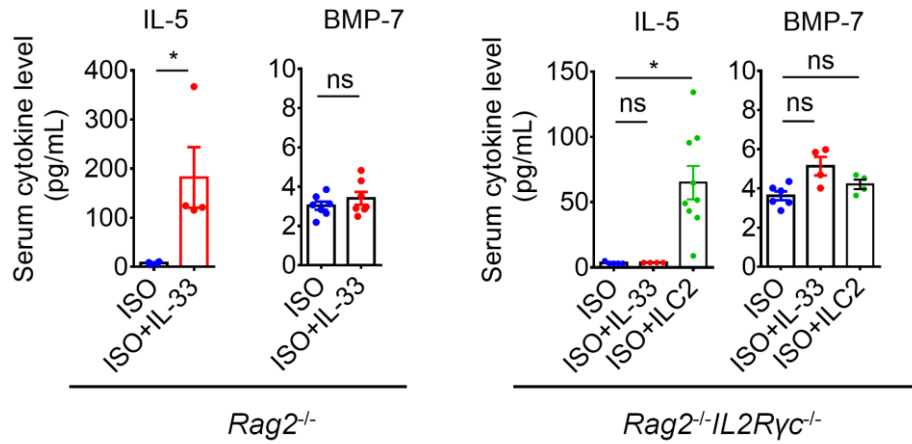

**Figure S6. ILC2 contribute to IL-33-induced circulating IL-5.** *Rag2*<sup>-/-</sup> and *Rag2*<sup>-/-</sup>*IL2Ryc*<sup>-/-</sup> mice were subcutaneously administered with isoproterenol (ISO; 30 mg/kg) for 3 days and intraperitoneally administered with saline or IL-33 (0.5 µg/mouse) on days 3, 5, and 7. The sera were collected on day 10 for ELISA analysis of IL-5 and BMP-7 levels. ns, not significant by one-way ANOVA followed by the Bonferroni multiple comparison post-hoc test.
